# Supplementary material
Source: publisher site journal article supplement (https://www.spandidos-publications.com/3981/downloadSupplementary)

Figure S1. Immunofluorescence staining assay. Chondrocytes were positively stained with Col-II and aggrecan, but negatively with Col-I and 11-fibrau. The images were captured under x200 magnification. Col, collagen.

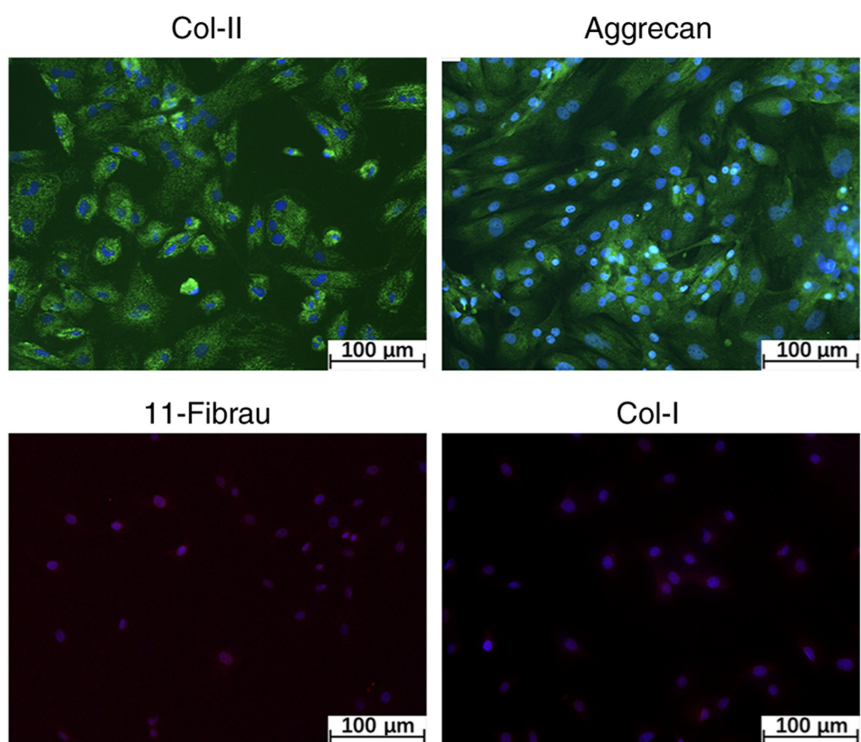

Supplement: Supplementary file 1 [file downloadSupplementary]
